# Supplementary material for: Optimization of Sulfonated Polycatechol:PEDOT Energy Storage Performance by the Morphology Control
Source: MDPI journal article supplement (doi:10.3390/nano12111917), 2022-06-03
Supplement: s1 [file s1]

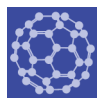

Supplementary Material for:

# Optimization of sulfonated polycatechol:PEDOT interpenetrating network energy storage performance by the morphology control

Anatoliy A. Vereshchagin, Vasiliy V. Potapenkov, Petr S. Vlasov, Daniil A. Lukyanov and Oleg V. Levin \*

Institute of Chemistry, Saint Petersburg University, St. Petersburg 199034, Russia; anatoliy\_ve@mail.ru (A.A.V.); bacuy.99@mail.ru (V.V.P.); petr\_vlasov@mail.ru (P.S.V.);  
lda93@yandex.ru (D.A.L.)

\* Correspondence: o.levin@spbu.ru; Tel.: +7-(812)-4286900

**Citation:** Vereshchagin, A.A.; Potapenkov, V.V.; Vlasov, P.S.; Lukyanov, D.A.; Levin, O.V. Optimization of Sulfonated Polycatechol: PEDOT Energy Storage Performance by the Morphology Control. *Nanomaterials* **2022**, *12*, 1917. <https://doi.org/10.3390/nano12111917>

Academic Editor: Wei Zhang

Received: 25 April 2022

Accepted: 30 May 2022

Published: 3 June 2022

**Publisher's Note:** MDPI stays neutral with regard to jurisdictional claims in published maps and institutional affiliations.

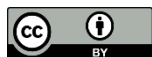

**Copyright:** © 2022 by the authors. Submitted for possible open access publication under the terms and conditions of the Creative Commons Attribution (CC BY) license (<https://creativecommons.org/licenses/by/4.0/>).

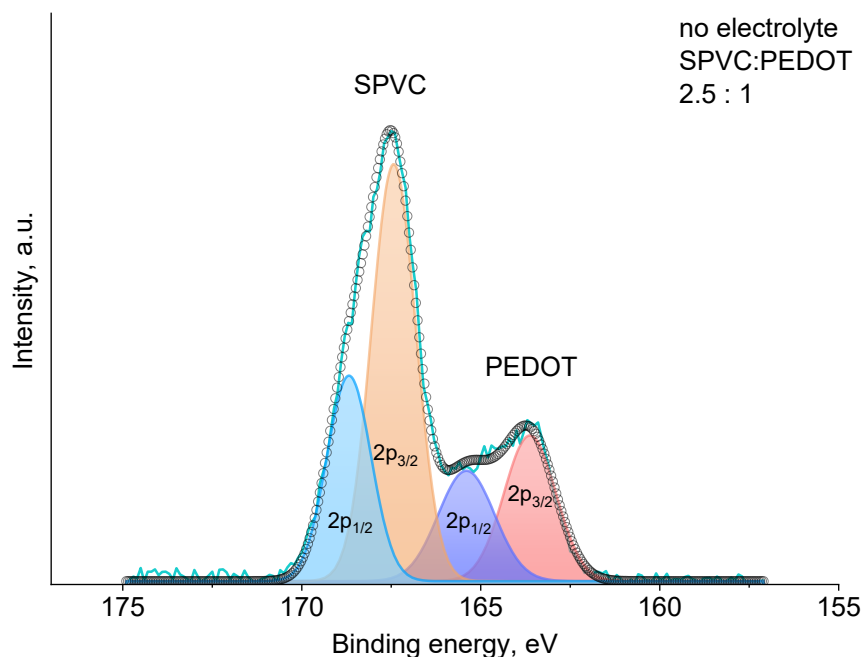

**Figure S1.** Fitted XPS spectrum of the PEDOT:SPVC film, no NaClO<sub>4</sub>.

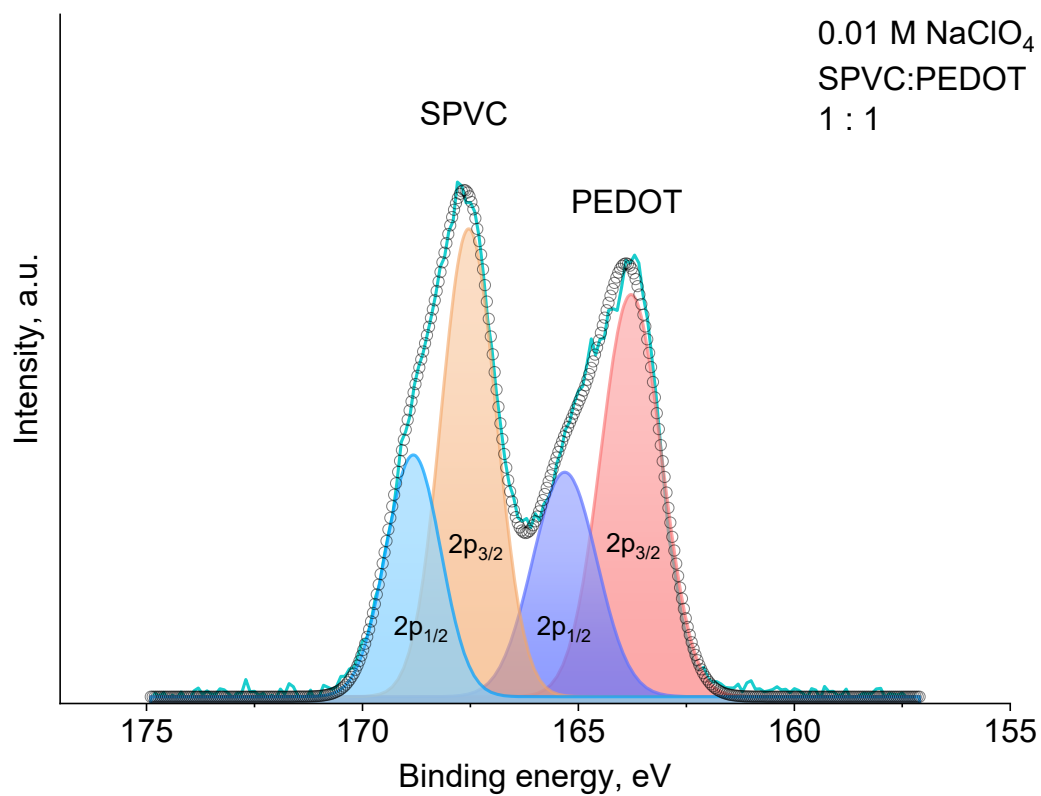

Figure S2. Fitted XPS spectrum of the PEDOT:SPVC film, 0.01 M NaClO<sub>4</sub>.

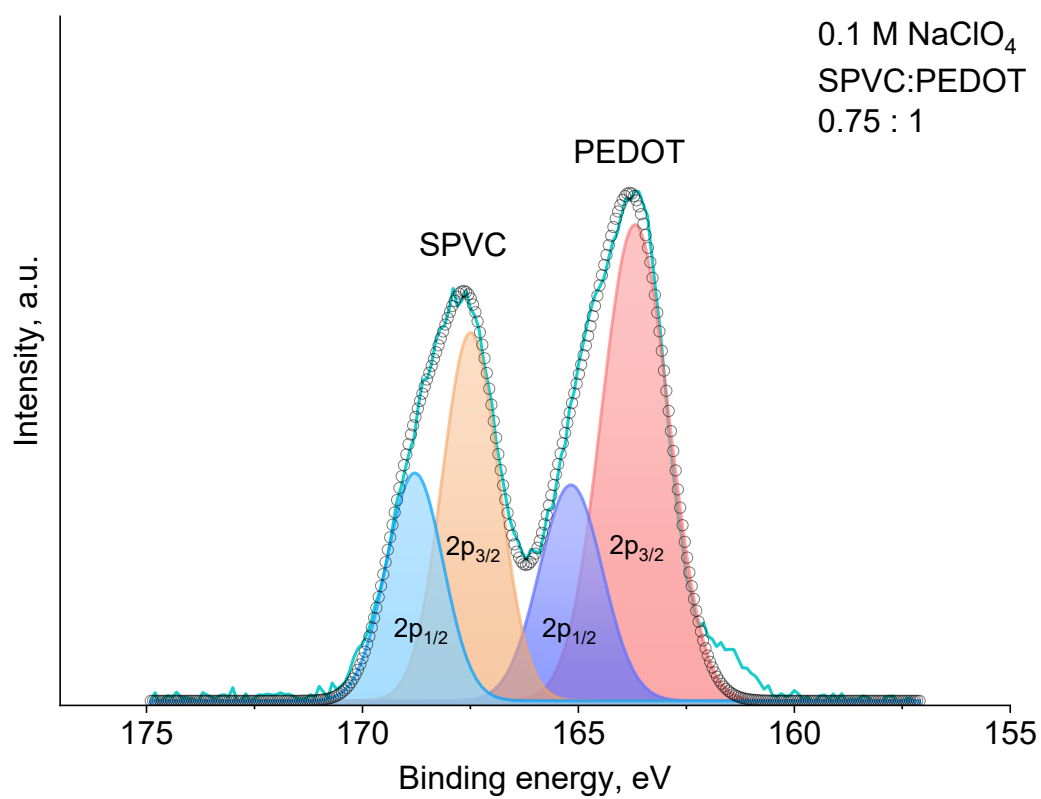

Figure S3. Fitted XPS spectrum of the PEDOT:SPVC film, 0.1 M NaClO<sub>4</sub>.

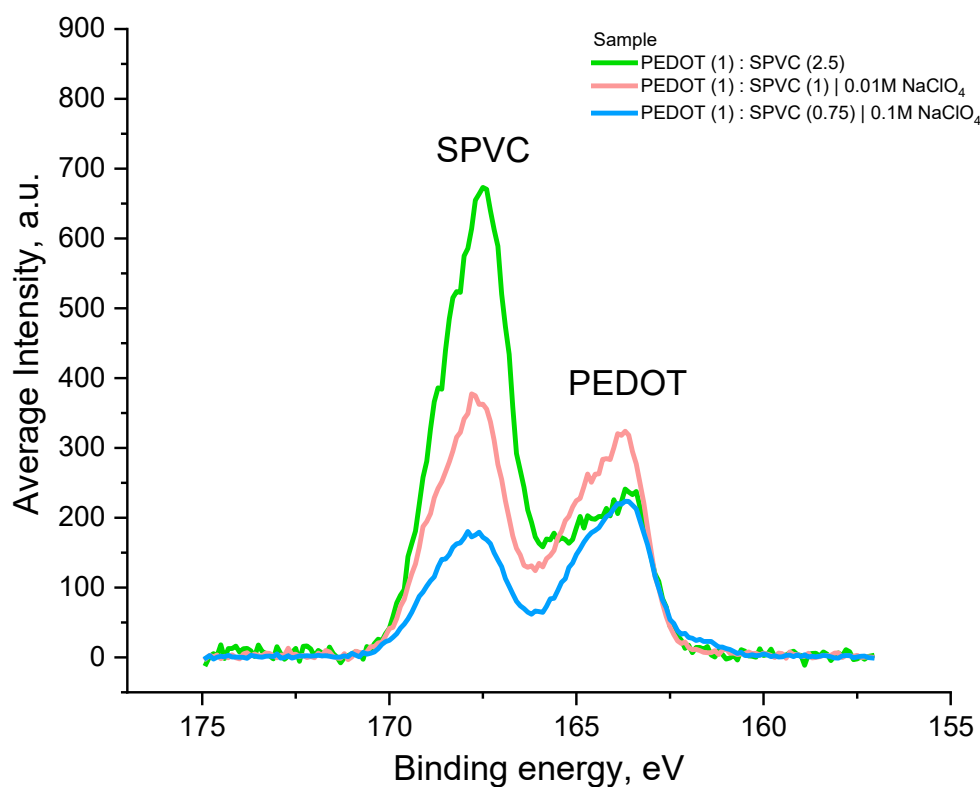

Figure S4. Overlaid XPS spectra of the PEDOT:SPVC with NaClO<sub>4</sub> additives.

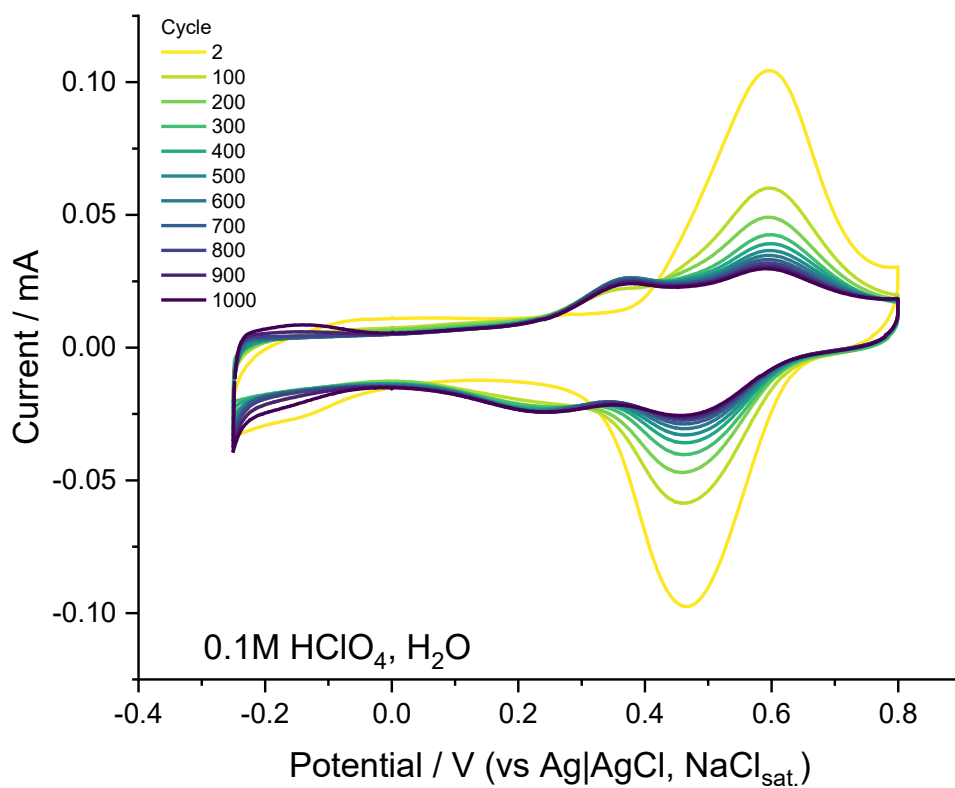

Figure S5. CV stability of PEDOT:SPVC, 20 mV s<sup>-1</sup>, 0.1 M HClO<sub>4</sub>.

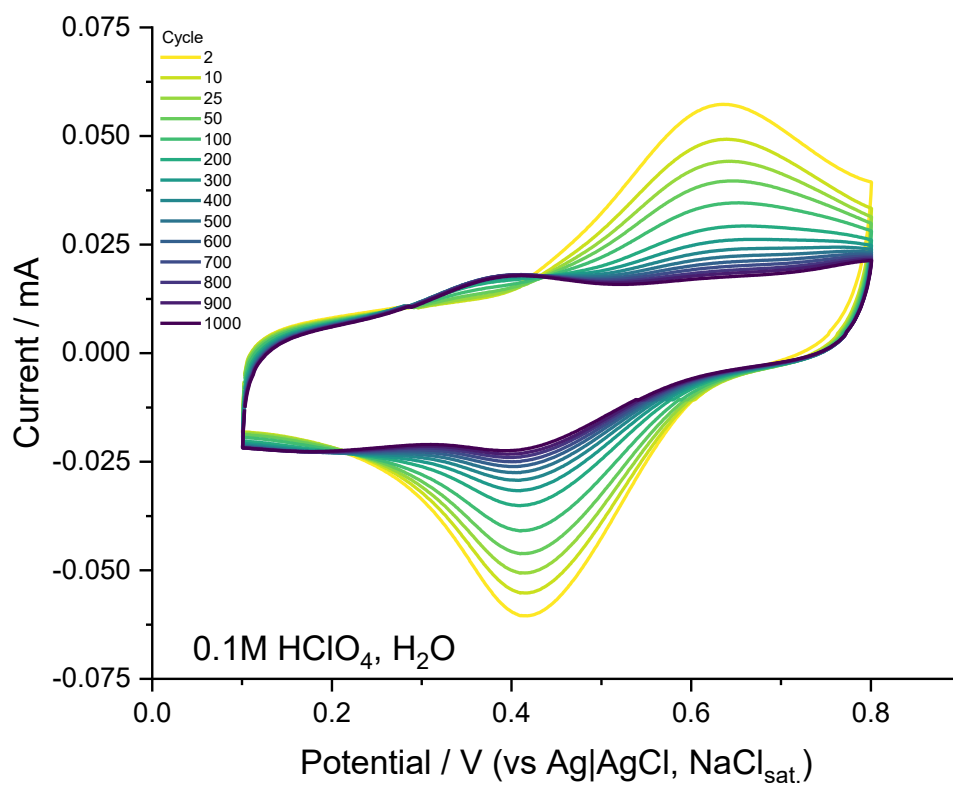

Figure S6. CV stability of PEDOT:SPVC, short range, 20 mV s<sup>-1</sup>, 0.1 M HClO<sub>4</sub>.

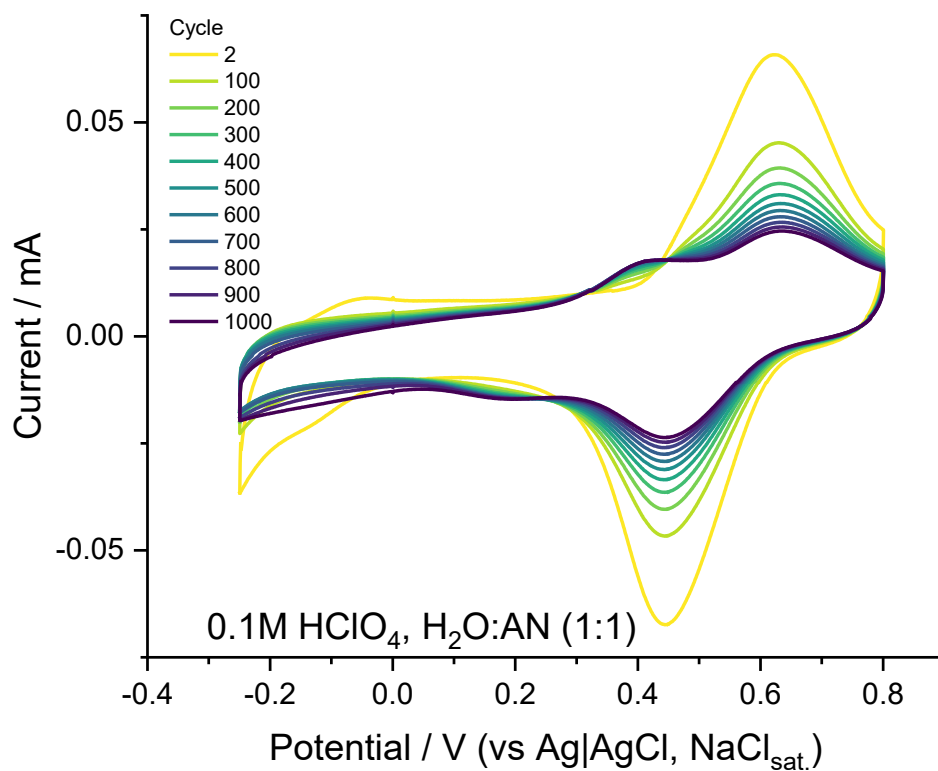

Figure S7. CV stability of PEDOT:SPVC, CH<sub>3</sub>CN additive, 20 mV s<sup>-1</sup>, 0.1 M HClO<sub>4</sub>.

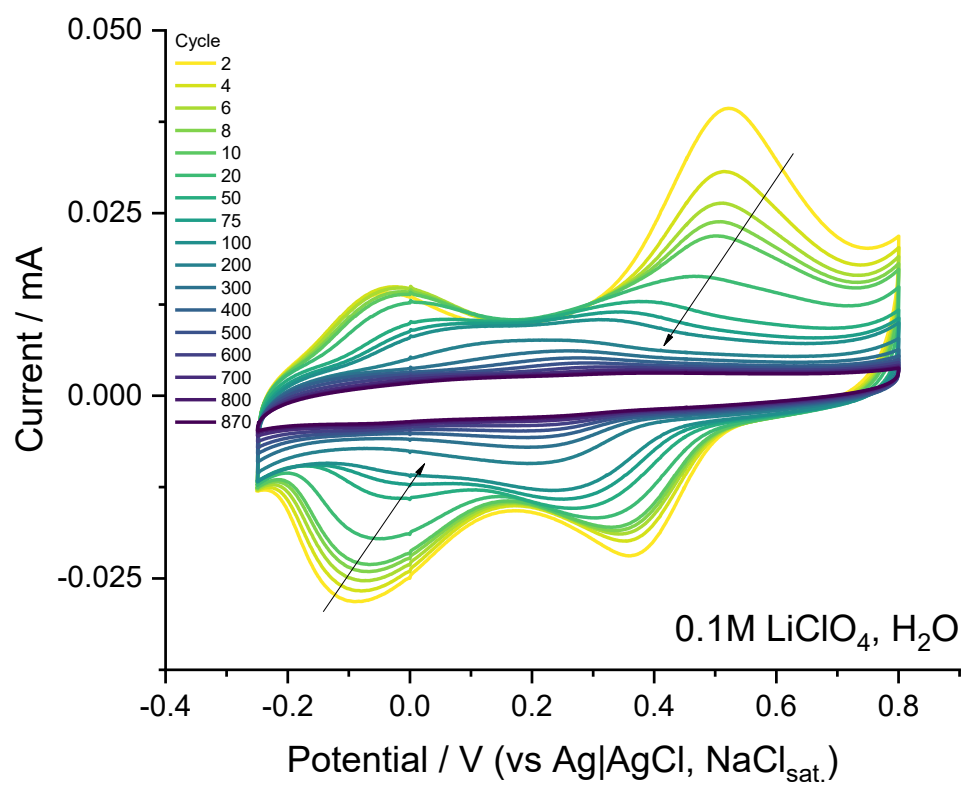

Figure S8. CV stability of PEDOT:SPVC, 20 mV s<sup>-1</sup>, 0.1 M LiClO<sub>4</sub>.

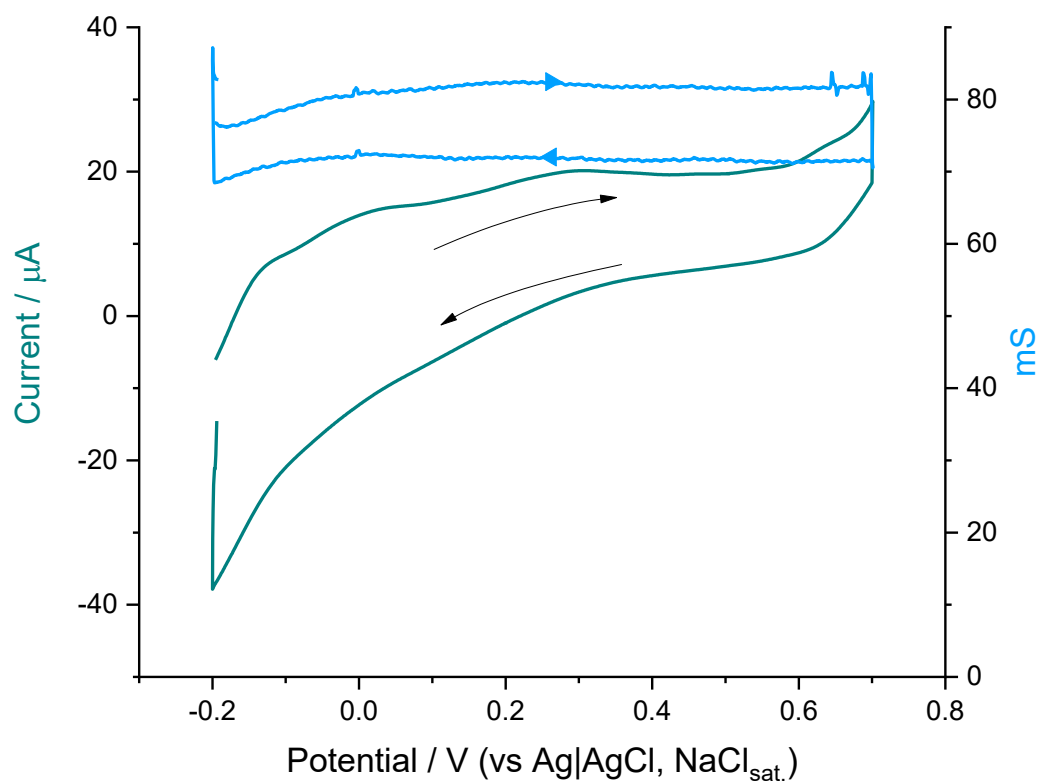

Figure S9. Conductance of the PEDOT:PSS film, 5 mV s<sup>-1</sup>, 0.1 M HClO<sub>4</sub>.

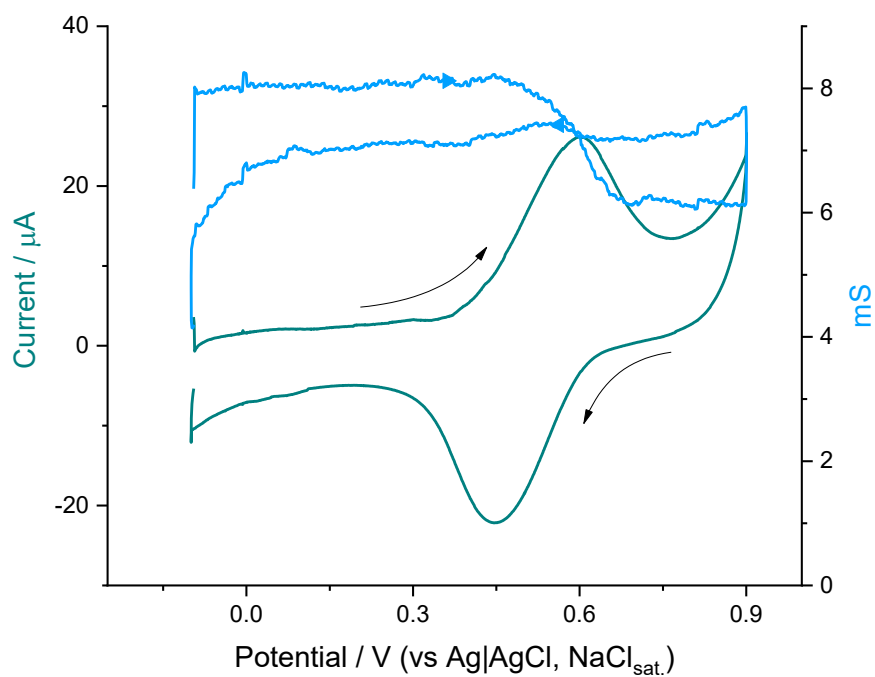

Figure S10. Conductance of the PEDOT:SPVC film,  $5 \text{ mV s}^{-1}$ ,  $0.1 \text{ M HClO}_4$ .

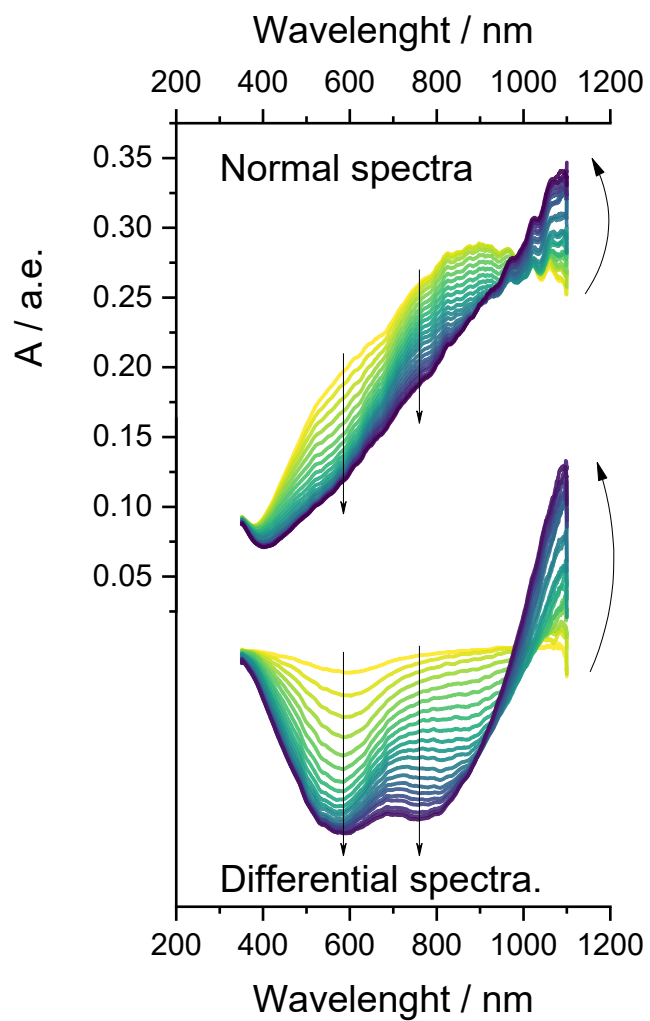

Figure S11. Potential-dependent UV-Vis spectra of PEDOT:PSS,  $0.1 \text{ M HClO}_4$ .

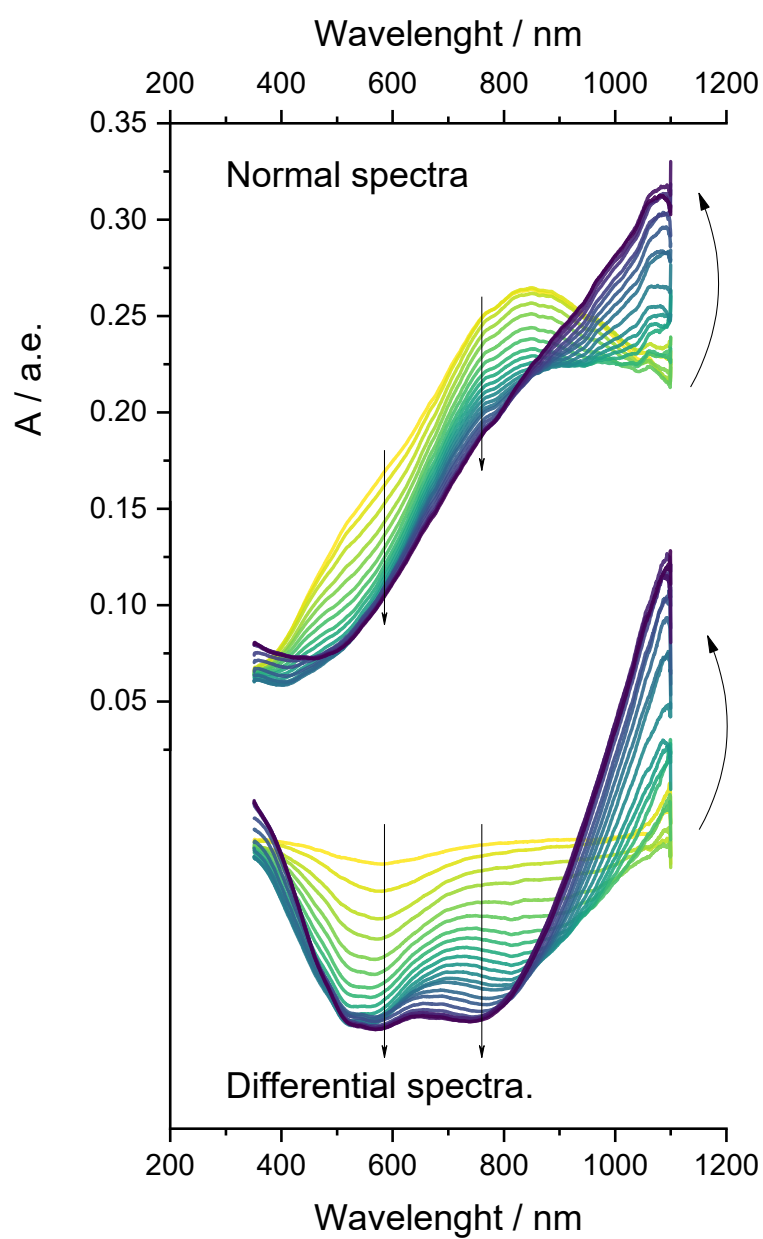

**Figure S12.** Potential-dependent UV-Vis spectra of PEDOT:SPVC, 0.1 M HClO<sub>4</sub>.
